# Supplementary material for: HLA-B*07, HLA-DRB1*07, HLA-DRB1*12, and HLA-C*03:02 Strongly Associate With BMI: Data From 1.3 Million Healthy Chinese Adults
Source: Oxford University Press journal article supplement (doi:10.2337/db17-0852), 2018-02-26
Supplement: db170852supplementarydata3.xlsx [file db170852supplementarydata3.xlsx]

## Sheet: Table S3
			BMI			Obesity			Overweight
Allele	Gene	Frequency	P Value	Beta±SE		P Value	OR(95%CI)		P Value	OR(95%CI)
A*02	HLA-A	0.306394	0.000406862	0.015±0.004		0.0388674	1.016(1.001,1.032)		0.653406	1.002(0.994,1.009)
B*07	HLA-B	0.0296089	6.88987e-10	0.071±0.011		0.00047928	1.073(1.031,1.116)		7.80295e-05	1.040(1.020,1.061)
B*08	HLA-B	0.00899854	0.00015288	0.079±0.021		0.0284044	1.084(1.009,1.164)		0.0961926	1.031(0.995,1.069)
B*13	HLA-B	0.109746	0.000436763	0.022±0.006		0.690412	1.005(0.982,1.028)		0.000114658	1.022(1.011,1.033)
B*46	HLA-B	0.100166	1.09526e-06	-0.042±0.009		0.223054	0.977(0.942,1.014)		0.00160845	0.973(0.957,0.990)
B*58	HLA-B	0.0574915	3.74958e-05	-0.086±0.021		0.00182354	0.859(0.781,0.945)		0.000577553	0.933(0.897,0.971)
C*07	HLA-C	0.175605	0.000508591	0.038±0.011		0.00479048	1.055(1.016,1.094)		0.294264	1.010(0.991,1.029)
DRB1*03	HLA-DRB1	0.0483155	1.06011e-07	-0.048±0.009		0.034555	0.963(0.929,0.997)		0.000238228	0.970(0.954,0.986)
DRB1*04	HLA-DRB1	0.112927	6.15338e-06	-0.028±0.006		0.00236907	0.964(0.941,0.987)		0.0773262	0.990(0.979,1.001)
DRB1*07	HLA-DRB1	0.0927135	1.31804e-08	0.041±0.007		0.0250974	1.029(1.004,1.055)		4.69655e-12	1.044(1.031,1.057)
DRB1*09	HLA-DRB1	0.144968	9.75525e-05	-0.024±0.006		0.397547	0.990(0.967,1.014)		3.06858e-06	0.974(0.963,0.985)
DRB1*12	HLA-DRB1	0.121266	1.51818e-09	0.047±0.008		0.114355	1.024(0.994,1.054)		0.0124218	1.018(1.004,1.032)
A*02:01	HLA-A	0.125413	3.74842e-06	0.035±0.007		0.0469527	1.025(1.000,1.049)		0.0896631	1.011(0.998,1.023)
B*07:02	HLA-B	0.0220517	1.12237e-07	0.089±0.017		0.000390943	1.097(1.042,1.155)		0.000100361	1.054(1.027,1.083)
B*27:04	HLA-B	0.00976336	4.14496e-05	-0.113±0.028		0.428572	0.960(0.868,1.062)		0.00150661	0.924(0.879,0.970)
B*40:01	HLA-B	0.0985924	5.77894e-05	-0.038±0.009		0.00594226	0.951(0.918,0.986)		0.00329305	0.975(0.959,0.992)
C*01:03	HLA-C	0.00631224	0.000100258	0.182±0.047		0.00271406	1.247(1.079,1.440)		0.00988842	1.106(1.024,1.194)
C*03:02	HLA-C	0.0593298	4.45065e-08	-0.085±0.016		0.0040514	0.921(0.871,0.974)		2.08057e-05	0.943(0.918,0.969)
DQB1*03:02	HLA-DQB1	0.0574131	0.000193716	-0.066±0.018		0.043295	0.936(0.879,0.998)		0.037154	0.968(0.939,0.998)
DQB1*06:02	HLA-DQB1	0.0764137	9.54976e-06	0.122±0.028		0.000143386	1.156(1.073,1.246)		0.000198776	1.082(1.038,1.127)
DRB1*03:01	HLA-DRB1	0.0480183	1.10649e-05	-0.049±0.011		0.090953	0.966(0.929,1.005)		0.00548548	0.973(0.955,0.992)
DRB1*07:01	HLA-DRB1	0.0933869	6.4856e-06	0.040±0.009		0.0871433	1.025(0.996,1.053)		9.58528e-09	1.042(1.028,1.057)
DRB1*12:02	HLA-DRB1	0.0824303	5.12977e-05	0.047±0.012		0.359617	1.020(0.978,1.064)		0.180836	1.014(0.993,1.035)
